# Supplementary material for: Multiplex polymerase chain reaction (PCR) with Nanopore sequencing for sequence-based detection of four tilapia pathogens
Source: PeerJ journal article supplement (doi:10.7717/peerj.19425), 2025-05-13
Supplement: Supplemental_Table2_revised.docx [file Supplemental_Table2_revised.docx]

**Supplemental Table 2.** Sources of plasmid template used in sensitivity assay.

| Pathogen | Description | Reference |
| --- | --- | --- |
| TiLV | Segment 9 (351 bp)/pGEM-T easy | (Thawornwattana et al., 2021) |
| ISKNV | MCP (1,362 bp)/pGEM-T easy | (Dong et al., 2017) |
| *F. orientalis* | HP (203 bp)/pPerfect | (Dong et al., 2016) |
| *S. agalactiae* (SAG) | groEL (351 bp)/pGEM-T easy | This study |

**References**

Dong HT, Gangnonngiw W, Phiwsaiya K, Charoensapsri W, Nguyen VV, Nilsen P, Pradeep PJ, Withyachumnarnkul B, Senapin S, Rodkhum C. 2016. Duplex PCR assay and in situ hybridization for detection of Francisella spp. and Francisella noatunensis subsp. orientalis in red tilapia. *Diseases of Aquatic Organisms* 120:39–47. DOI: 10.3354/dao03021.

Dong HT, Jitrakorn S, Kayansamruaj P, Pirarat N, Rodkhum C, Rattanarojpong T, Senapin S, Saksmerprome V. 2017. Infectious spleen and kidney necrosis disease (ISKND) outbreaks in farmed barramundi (Lates calcarifer) in Vietnam. *Fish & Shellfish Immunology* 68:65–73. DOI: 10.1016/j.fsi.2017.06.054.

Thawornwattana Y, Dong HT, Phiwsaiya K, Sangsuriya P, Senapin S, Aiewsakun P. 2021. Tilapia lake virus (TiLV): Genomic epidemiology and its early origin. *Transboundary and Emerging Diseases* 68:435–444. DOI: 10.1111/tbed.13693.
