# Supplementary material for: Multiplex polymerase chain reaction (PCR) with Nanopore sequencing for sequence-based detection of four tilapia pathogens
Source: PeerJ journal article supplement (doi:10.7717/peerj.19425), 2025-05-13
Supplement: Supplemental_Table3.docx [file Supplemental_Table3.docx]

**Supplemental Table 3.** Reaction mixture and cycling conditions for multiplex PCR diagnosis.

| Reagent | Volume (µL) | Final conc. |
| --- | --- | --- |
| Template | 4 | Up to 400 ng |
| 10 µM groEL F | 0.4 | 160 nM |
| 10 µM groEL R | 0.4 | 160 nM |
| 10 µM Francis-n-oF1 | 0.4 | 160 nM |
| 10 µM Francis-n-oR1 | 0.4 | 160 nM |
| 10 µM TiLV-S9-qF | 0.2 | 80 nM |
| 10 µM TiLV-S9-qR | 0.2 | 80 nM |
| 10 µM Meg-MCP160 | 0.2 | 80 nM |
| 10 µM Meg-MCP349R | 0.2 | 80 nM |
| 2X KAPA SYBR FAST qPCR Master Mix | 12.5 | 1X |
| 50X KAPA RT Mix | 0.5 | 1X |
| 10 mM dNTPs | 0.4 | 160 µM |
| D.W. | 5.2 |  |
| Total | 25 |  |

| Step | Condition | Cycle |
| --- | --- | --- |
| Reverse transcription (RT) | 42°C 5 min | 1 |
| RT inactivation | 95°C 3 min | 1 |
| Denaturation | 95°C 10 sec | 40 |
| Annealing and extension | 60°C 30 sec |
| Final extension | 60°C 5 min | 1 |
| Hold | 12°C | - |
