# Supplementary material for: Multiplex polymerase chain reaction (PCR) with Nanopore sequencing for sequence-based detection of four tilapia pathogens
Source: PeerJ journal article supplement (doi:10.7717/peerj.19425), 2025-05-13
Supplement: Supplemental_Table_6.docx [file Supplemental_Table_6.docx]

**Supplemental Table 6.** Summary of the quantifiable benefits of mPCR + Nanopore

| **Estimation for 4 pathogens** | **qPCR** | **mPCR + Nanopore**  (This study) |
| --- | --- | --- |
| DNA template | 4-8 µl | 4 µl |
| PCR reagents | 4 sets | 1 set |
| Liquid transfers | 4 sets | 1 set |
| Time for mixing & amplification | 8 h | 2 h |
| Gel electrophoresis | no | optional |
| Detection limit | 1-100 copies/reaction | 1,000-10,000 copies/reaction |
| Sequence information | no | yes |
| Sequencing | If Sanger sequencing required, turnaround time is ~7 working days. | Nanopore sequencing, time to results is 3 h |
| Portability | Benchtop 96-well qPCR machine: 10-20 kg | Yes (0.1 kg) |
| Cost of sequencing for 24 samples | 4 amplicons with bidirectional sequencing @ USD5/sample x 24 samples =  4 x 2 x 5 x 24 = USD 960  Cost per sample =  USD 960 / 24 = USD 40 | 600 USD/flow cell (1 flowcell can sequence up to 96 samples)  Cost per sample =  USD600/96 = USD 6.25 |
| System Acquisition Cost | USD 10,000-25,000 | USD 1,000 |
